# Supplementary material for: Clinical relevance of lung transplantation for COVID-19 ARDS: a nationwide study
Source: PubMed Central journal article supplement — Eur Respir J. 2022 Sep 1;60(3):2102404. doi: 10.1183/13993003.02404-2021 (PMC8932280; doi:10.1183/13993003.02404-2021), 2022-09-01
Supplement: ERJ-02404-2021.Table_S1.pdf [file ERJ-02404-2021.Table_S1.pdf]

### Supplementary Table S1

Demographics of patients with COVID-19 infection requiring hospital and ICU admission in Austria between January 1, 2020 and May 30, 2021.

| <b>Hospitalizations</b>                     |                                                 |              |
|---------------------------------------------|-------------------------------------------------|--------------|
| Number of all patients                      | n=39485                                         |              |
| Sex (female)                                | n=18129 (46%)                                   |              |
| Age < 65 years                              | n=14363 (36%)                                   |              |
| Length of hospital stay (days, median, IQR) | 8 (3-18)                                        |              |
| Referred to ICU*                            | n=6408 (16%)                                    |              |
| Deceased (mortality in %)                   | n=7109 (18%)                                    |              |
| <b>ICU admissions*</b>                      |                                                 |              |
| Number of all patients                      | n=6408                                          |              |
| Sex (female)                                | n=2181 (34%)                                    |              |
| Age < 65 years                              | n=2470 (39%)                                    |              |
| Comorbidities                               | Hematologic disease                             | n=106 (1.6%) |
|                                             | HIV positive                                    | n=2 (<1%)    |
|                                             | AIDS                                            | n=1 (<1%)    |
|                                             | Malignancy (with metastasis)                    | n=67 (1%)    |
|                                             | Malignancy (without metastasis)                 | n=145 (2%)   |
|                                             | Liver failure                                   | n=50 (<1%)   |
|                                             | Heart failure NYHA II                           | n=518 (8%)   |
|                                             | Heart failure NYHA III                          | n=228 (4%)   |
|                                             | Heart failure NYHA IV                           | n=86 (1%)    |
|                                             | Chronic respiratory disease, COPD               | n=548 (9%)   |
|                                             | Chronic renal failure                           | n=584 (9%)   |
|                                             | Alcohol abuse                                   | n=95 (1%)    |
|                                             | Drug abuse                                      | n=7 (<1%)    |
|                                             | Receives immunosuppressive treatment            | n=129 (2%)   |
|                                             | Insulin-dependent diabetes mellitus type I      | n=325 (5%)   |
|                                             | Non-insulin-dependent diabetes mellitus type II | n=800 (12%)  |
|                                             | Arterial hypertension                           | n=2586 (40%) |
| Mechanical ventilation                      | n=2323 (36%)                                    |              |
| ECMO support                                | n=183 (3%)                                      |              |
| Renal replacement therapy                   | n=335 (5%)                                      |              |
| Length of ICU stay (days, median, IQR)      | 8 (4-17)                                        |              |
| Deceased (mortality in %)                   | n=2368 (37%)                                    |              |

\*Including intermediate care units / respiratory care units (IMCU / RCU). IQR = interquartile range; ICU = intensive care unit; HIV = human immunodeficiency virus; AIDS = Acquired immunodeficiency syndrome; NYHA = New York Heart Association; COPD = Chronic obstructive pulmonary disease; ECMO = extracorporeal membrane oxygenation;
